# Supplementary material for: Development of New Analytical Microwave-Assisted Extraction Methods for Bioactive Compounds from Myrtle (Myrtus communis L.)
Source: PubMed Central journal article supplement (PMC6278529; doi:10.3390/molecules23112992), 2018-11-16
Supplement: molecules-23-02992-s001.pdf [file molecules-23-02992-s001.pdf]

**Table S1:** Mass spectra information of the eleven anthocyanins present in myrtle berries.

| Anthocyanins present in myrtle berries | Molecular formula                               | Theoretical mass (m/z) | Measured mass (m/z) |
|----------------------------------------|-------------------------------------------------|------------------------|---------------------|
| Delphinidin 3,5- <i>O</i> -diglucoside | C <sub>27</sub> H <sub>31</sub> O <sub>17</sub> | 627.1561               | 627.1556            |
| Delphinidin 3- <i>O</i> -glucoside     | C <sub>21</sub> H <sub>21</sub> O <sub>12</sub> | 465.1033               | 465.1047            |
| Cyanidin 3- <i>O</i> -galactoside      | C <sub>21</sub> H <sub>21</sub> O <sub>11</sub> | 449.1084               | 449.1089            |
| Cyanidin 3- <i>O</i> -glucoside        | C <sub>21</sub> H <sub>21</sub> O <sub>11</sub> | 449.1084               | 449.1089            |
| Cyanidin 3- <i>O</i> -arabinoside      | C <sub>20</sub> H <sub>19</sub> O <sub>10</sub> | 419.0978               | 419.0979            |
| Petunidin 3- <i>O</i> -glucoside       | C <sub>22</sub> H <sub>23</sub> O <sub>12</sub> | 479.1190               | 479.1195            |
| Delphinidin 3- <i>O</i> -arabinoside   | C <sub>20</sub> H <sub>19</sub> O <sub>11</sub> | 435.0927               | 435.0931            |
| Peonidin 3- <i>O</i> -glucoside        | C <sub>22</sub> H <sub>23</sub> O <sub>11</sub> | 463.1240               | 463.1249            |
| Malvidin 3- <i>O</i> -glucoside        | C <sub>23</sub> H <sub>25</sub> O <sub>12</sub> | 493.1346               | 493.1385            |
| Petunidin 3- <i>O</i> -arabinoside     | C <sub>21</sub> H <sub>21</sub> O <sub>11</sub> | 449.1084               | 449.1101            |
| Malvidin 3- <i>O</i> -arabinoside      | C <sub>22</sub> H <sub>23</sub> O <sub>11</sub> | 463.1240               | 463.1238            |

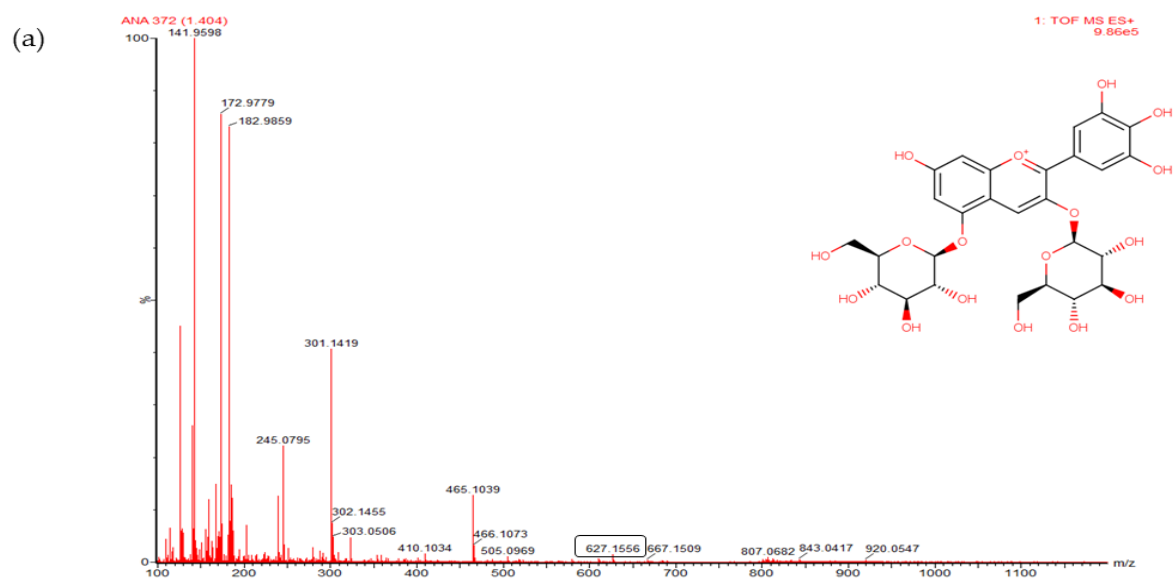

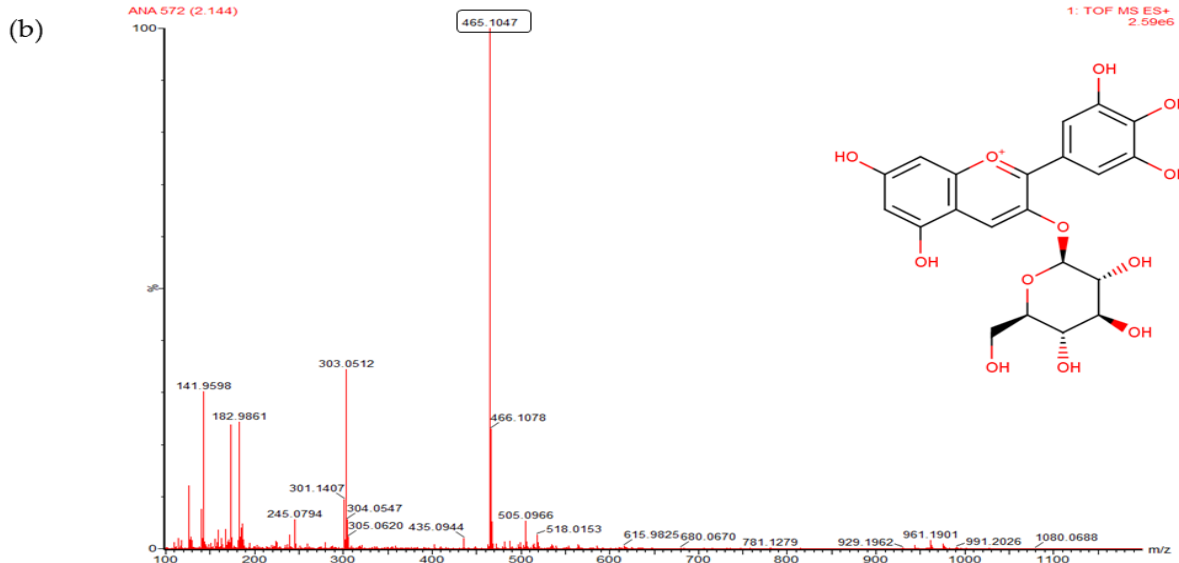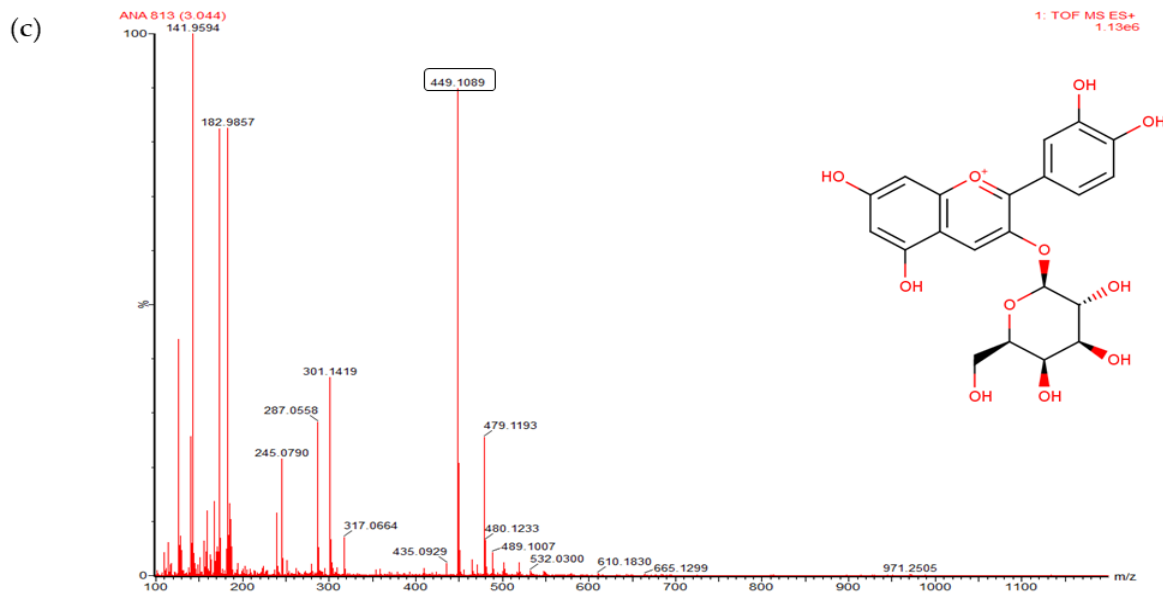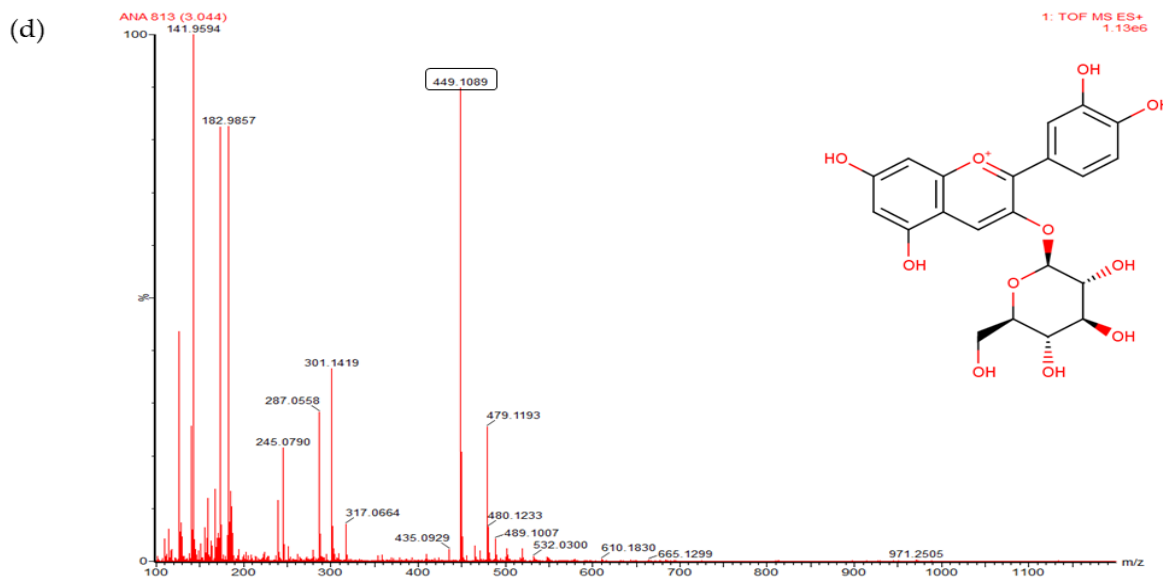

(e)

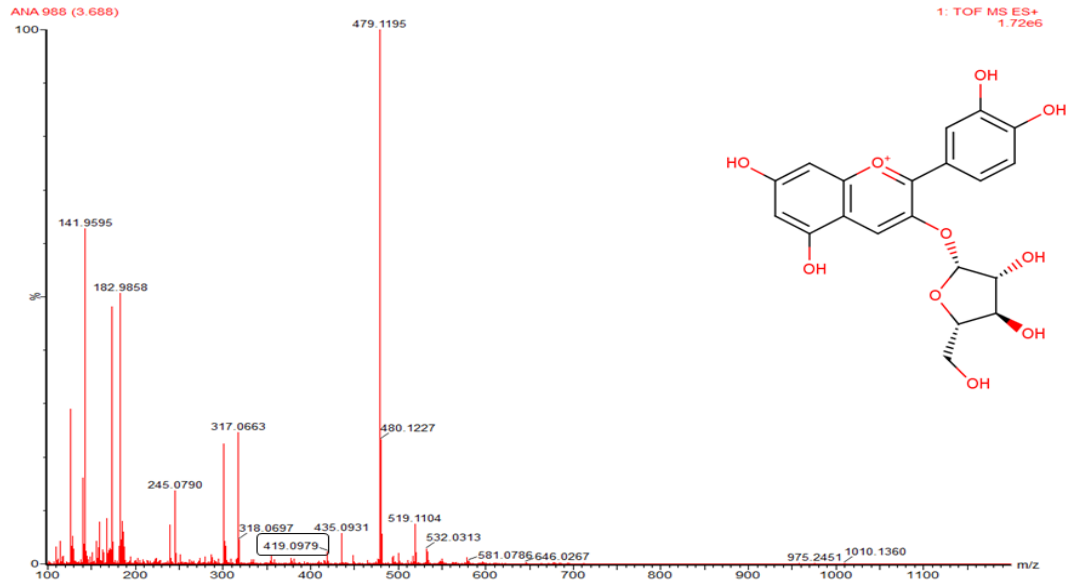

(f)

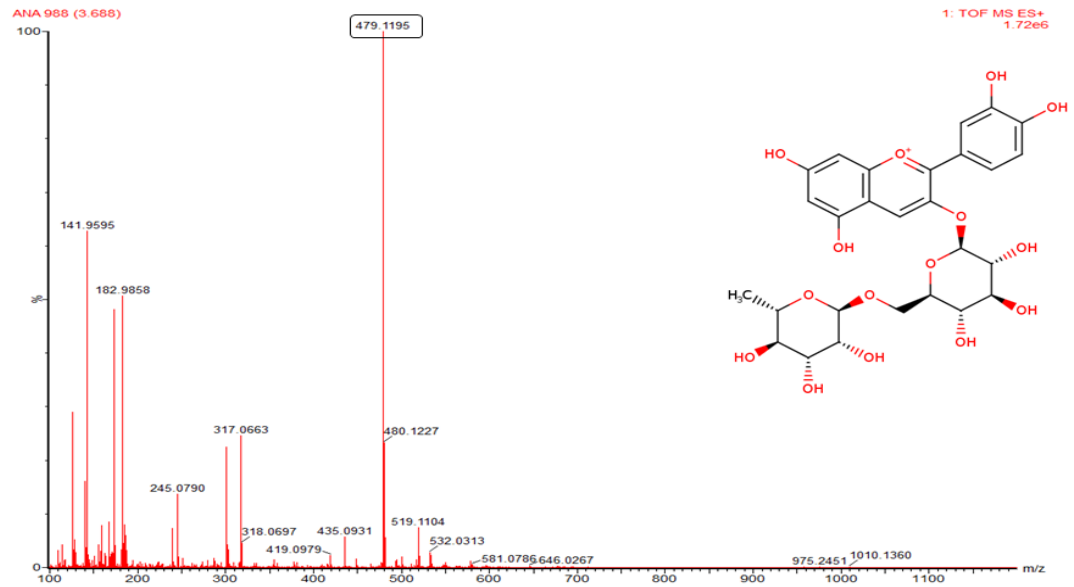

(g)

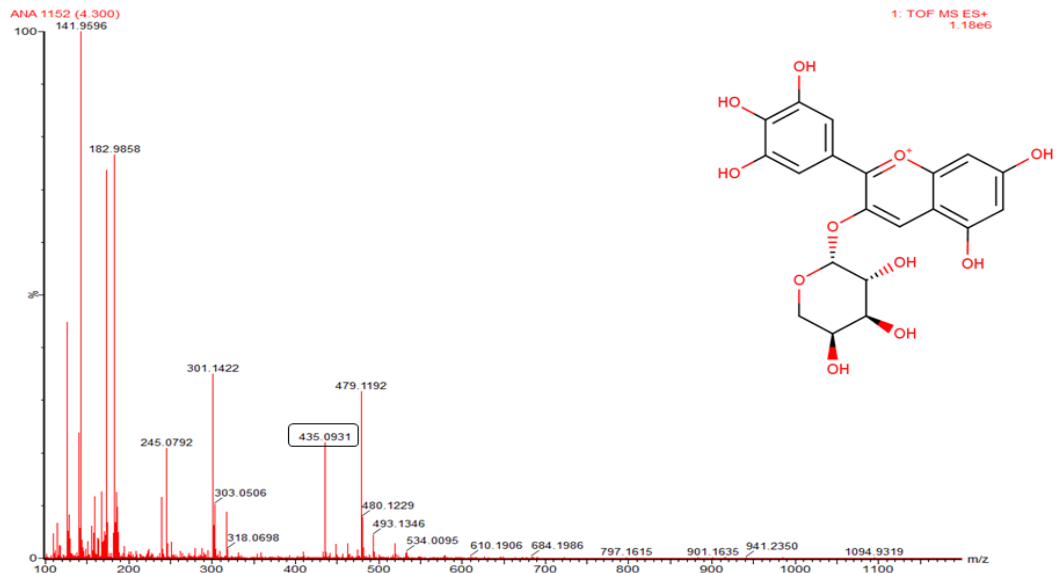

(h)

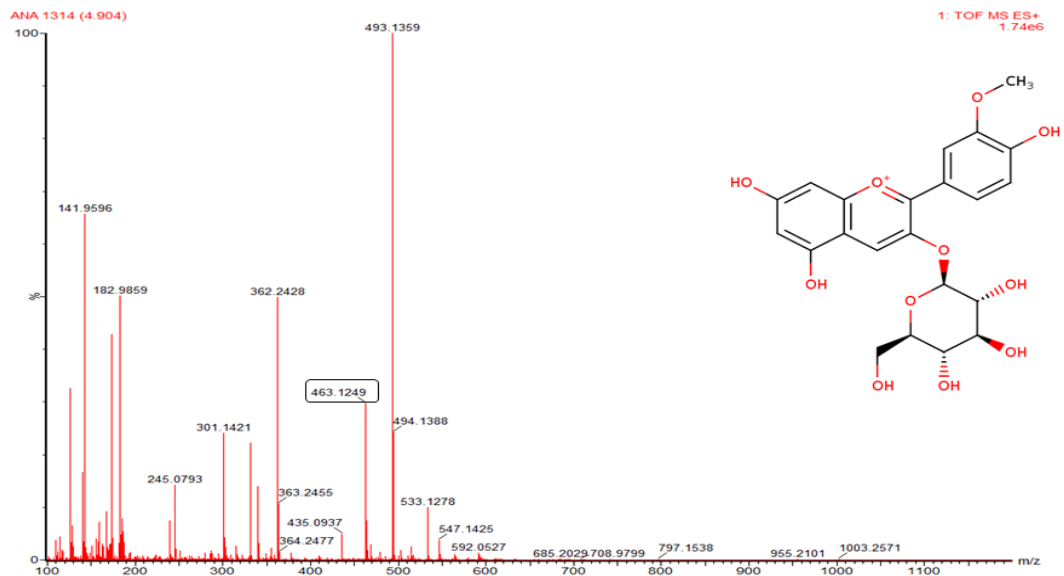

(i)

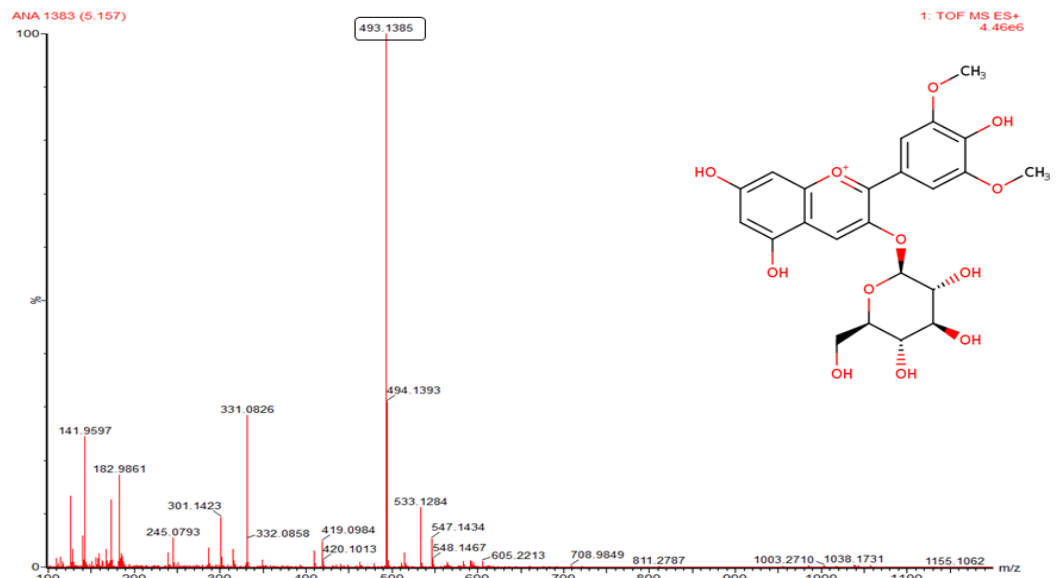

(j)

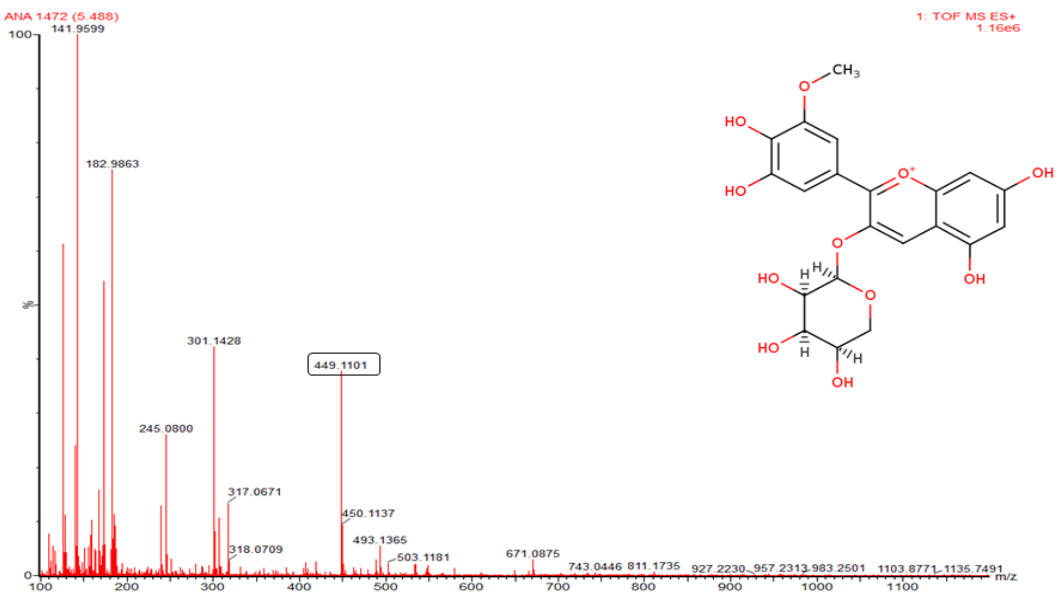

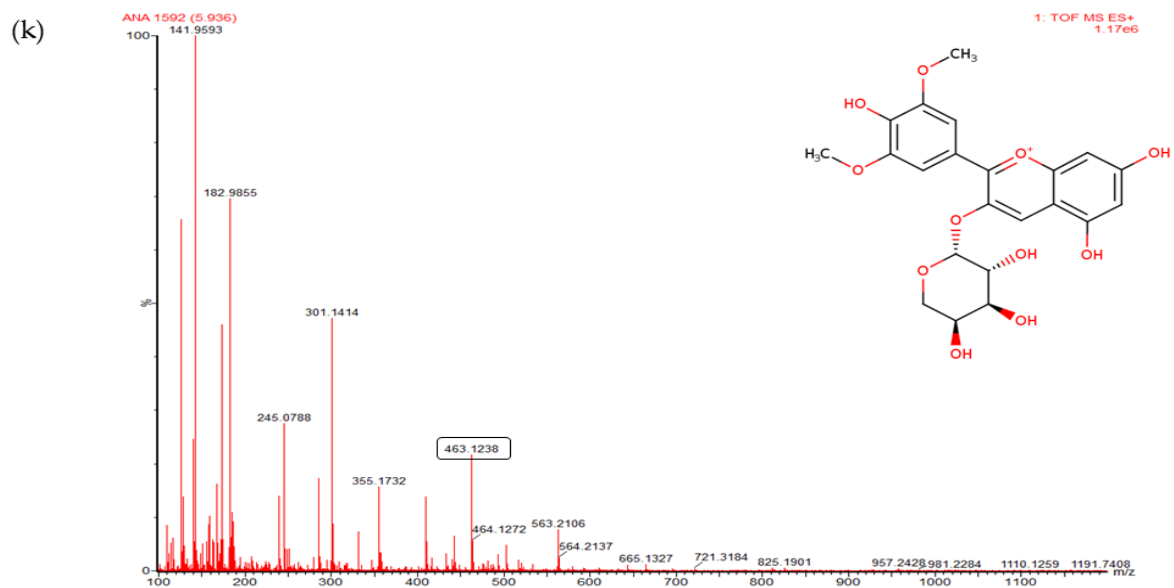

**Figure S1:** MS spectra and structure of the eleven anthocyanins identified in myrtle berries: (a) Delphinidin 3,5-*O*-diglucoside; (b) Delphinidin 3-*O*-glucoside; (c) Cyanidin 3-*O*-galactoside; (d) Cyanidin 3-*O*-glucoside; (e) Cyanidin 3-*O*-arabinoside; (f) Petunidin 3-*O*-glucoside; (g) Delphinidin 3-*O*-arabinoside; (h) Peonidin 3-*O*-glucoside; (i) Malvidin 3-*O*-glucoside; (j) Petunidin 3-*O*-arabinoside; (k) Malvidin 3-*O*-arabinoside.
